# Supplementary material for: Zearalenone (ZEN) and Its Metabolite Levels in Tissues of Wild Boar (Sus scrofa) from Southern Italy: A Pilot Study
Source: MDPI journal article supplement (doi:10.3390/toxins15010056), 2023-01-09
Supplement: s1 [file s1]

## Supplementary file

**Table S1.** Validation parameters of HPLC method; (LOD = limit of detection, LOQ = limit of quantification,  $r^2$  = coefficient of correlation, SD = standard deviation, RSD = relative standard deviation).

| Parameters                     |                             | Muscle            | Liver             | Kidney            |
|--------------------------------|-----------------------------|-------------------|-------------------|-------------------|
| ZEL                            |                             |                   |                   |                   |
| LOD ( $\mu\text{g/kg}$ )       |                             | 0.05              | 0.05              | 0.05              |
| LOQ ( $\mu\text{g/kg}$ )       |                             | 0.10              | 0.10              | 0.10              |
| $r^2$                          |                             | 0.998             | 0.996             | 0.995             |
| <b>Repeatability</b>           |                             |                   |                   |                   |
| 0.1                            | Mean concentration $\pm$ SD | $0.064 \pm 0.004$ | $0.068 \pm 0.003$ | $0.069 \pm 0.001$ |
|                                | RSD (%)                     | 6.30              | 3.89              | 1.67              |
| 1.0                            | Mean concentration $\pm$ SD | $0.76 \pm 0.01$   | $0.70 \pm 0.02$   | $0.72 \pm 0.03$   |
|                                | RSD (%)                     | 2.00              | 2.47              | 4.03              |
| 5.0                            | Mean concentration $\pm$ SD | $3.58 \pm 0.02$   | $3.60 \pm 0.05$   | $3.62 \pm 0.07$   |
|                                | RSD (%)                     | 0.65              | 1.25              | 2.00              |
| <b>Reproducibility</b>         |                             |                   |                   |                   |
| 0.1                            | Mean concentration $\pm$ SD | $0.064 \pm 0.003$ | $0.067 \pm 0.002$ | $0.069 \pm 0.001$ |
|                                | RSD (%)                     | 4.56              | 3.33              | 1.74              |
| 1.0                            | Mean concentration $\pm$ SD | $0.75 \pm 0.02$   | $0.73 \pm 0.04$   | $0.73 \pm 0.02$   |
|                                | RSD (%)                     | 2.90              | 5.14              | 3.46              |
| 5.0                            | Mean concentration $\pm$ SD | $3.65 \pm 0.08$   | $3.62 \pm 0.03$   | $3.60 \pm 0.05$   |
|                                | RSD (%)                     | 2.30              | 1.63              | 1.50              |
| <b>Recovery %</b>              |                             |                   |                   |                   |
| 0.1                            |                             | $63.67 \pm 2.87$  | $66.83 \pm 2.30$  | $69.33 \pm 1.21$  |
|                                |                             | $74.67 \pm 2.16$  | $73.17 \pm 3.76$  | $73.00 \pm 2.53$  |
| 5.0                            |                             | $71.33 \pm 1.62$  | $72.43 \pm 0.89$  | $71.93 \pm 2.09$  |
| <b><math>\alpha</math>-ZEL</b> |                             |                   |                   |                   |
| LOD ( $\mu\text{g/kg}$ )       |                             | 0.05              | 0.05              | 0.05              |
| LOQ ( $\mu\text{g/kg}$ )       |                             | 0.10              | 0.10              | 0.10              |
| $r^2$                          |                             | 0.992             | 0.993             | 0.995             |
| <b>Repeatability</b>           |                             |                   |                   |                   |
| 0.1                            | Mean concentration $\pm$ SD | $0.075 \pm 0.004$ | $0.067 \pm 0.002$ | $0.069 \pm 0.002$ |
|                                | RSD (%)                     | 5.58              | 3.12              | 3.83              |
| 1.0                            | Mean concentration $\pm$ SD | $0.73 \pm 0.02$   | $0.69 \pm 0.01$   | $0.70 \pm 0.01$   |
|                                | RSD (%)                     | 2.86              | 2.20              | 1.50              |
| 5.0                            | Mean concentration $\pm$ SD | $3.71 \pm 0.03$   | $3.63 \pm 0.05$   | $3.75 \pm 0.05$   |
|                                | RSD (%)                     | 1.86              | 1.59              | 2.60              |
| <b>Reproducibility</b>         |                             |                   |                   |                   |
| 0.1                            | Mean concentration $\pm$ SD | $0.072 \pm 0.004$ | $0.068 \pm 0.002$ | $0.070 \pm 0.003$ |
|                                | RSD (%)                     | 5.07              | 3.77              | 4.88              |
| 1.0                            | Mean concentration $\pm$ SD | $0.72 \pm 0.03$   | $0.71 \pm 0.05$   | $0.73 \pm 0.05$   |
|                                | RSD (%)                     | 2.89              | 3.86              | 4.12              |
| 5.0                            | Mean concentration $\pm$ SD | $3.68 \pm 0.05$   | $3.59 \pm 0.06$   | $3.71 \pm 0.08$   |
|                                | RSD (%)                     | 2.46              | 2.72              | 3.14              |
| <b>Recovery %</b>              |                             |                   |                   |                   |
| 0.1                            |                             | $72.50 \pm 3.68$  | $67.50 \pm 2.87$  | $70.33 \pm 2.73$  |
|                                |                             | $71.67 \pm 2.96$  | $71.33 \pm 2.73$  | $69.83 \pm 1.56$  |
| 5.0                            |                             | $73.47 \pm 2.30$  | $71.80 \pm 1.24$  | $74.27 \pm 2.58$  |
| <b><math>\beta</math>-ZEL</b>  |                             |                   |                   |                   |
| LOD ( $\mu\text{g/kg}$ )       |                             | 0.10              | 0.10              | 0.10              |
| LOQ ( $\mu\text{g/kg}$ )       |                             | 0.25              | 0.25              | 0.25              |
| $r^2$                          |                             | 0.993             | 0.996             | 0.991             |
| <b>Repeatability</b>           |                             |                   |                   |                   |
| 0.1                            | Mean concentration $\pm$ SD | $0.063 \pm 0.002$ | $0.074 \pm 0.003$ | $0.070 \pm 0.002$ |
|                                | RSD (%)                     | 4.02              | 4.45              | 2.85              |
| 1.0                            | Mean concentration $\pm$ SD | $0.75 \pm 0.02$   | $0.73 \pm 0.03$   | $0.68 \pm 0.03$   |

|                        |                             |                   |                   |                   |
|------------------------|-----------------------------|-------------------|-------------------|-------------------|
| 5.0                    | RSD (%)                     | 2.86              | 2.20              | 1.50              |
|                        | Mean concentration $\pm$ SD | 3.61 $\pm$ 0.05   | 3.64 $\pm$ 0.05   | 3.59 $\pm$ 0.08   |
|                        | RSD (%)                     | 2.39              | 2.88              | 3.63              |
| <b>Reproducibility</b> |                             |                   |                   |                   |
| 0.1                    | Mean concentration $\pm$ SD | 0.063 $\pm$ 0.002 | 0.072 $\pm$ 0.005 | 0.071 $\pm$ 0.003 |
|                        | RSD (%)                     | 3.01              | 6.01              | 4.37              |
| 1.0                    | Mean concentration $\pm$ SD | 0.74 $\pm$ 0.04   | 0.74 $\pm$ 0.03   | 0.69 $\pm$ 0.05   |
|                        | RSD (%)                     | 4.58              | 3.36              | 4.59              |
| 5.0                    | Mean concentration $\pm$ SD | 3.64 $\pm$ 0.06   | 3.66 $\pm$ 0.04   | 3.60 $\pm$ 0.05   |
|                        | RSD (%)                     | 2.65              | 2.06              | 2.45              |
| <b>Recovery %</b>      |                             |                   |                   |                   |
| 0.1                    |                             | 63.00 $\pm$ 3.89  | 72.43 $\pm$ 4.35  | 72.50 $\pm$ 3.20  |
| 1.0                    |                             | 74.50 $\pm$ 2.67  | 73.83 $\pm$ 2.48  | 69.17 $\pm$ 2.48  |
| 5.0                    |                             | 72.70 $\pm$ 2.20  | 73.90 $\pm$ 1.77  | 73.13 $\pm$ 3.33  |
